# Supplementary material for: Clinical outcomes in lupus nephritis patients treated with belimumab in real-life setting: a retrospective comparative study in China
Source: PeerJ. 2024 Sep 19;12:e18028. doi: 10.7717/peerj.18028 (PMC11416754; doi:10.7717/peerj.18028)
Supplement: Supplemental Information 1 [file peerj-12-18028-s001.xlsx]

## Sheet: Sheet1
patient ID	group	gender	age	LN duration	SLE duration	follow-up time	pathological type	SLEDAI-baseline	dadna-baseline	C3-baseline	C4-baseline	24-hour proteinuria-baseline	UACR-baseline	creatinine-baseline	B-cell percent-baseline	proteinuria-baseline	hematuria-baseline	Leukocytouria-baseline	cylindruria-baseline	Glucocorticoid dose-baseline	GFR-baseline	PGA-baseline	IgA-baseline	IgM-baseline	IgG-baseline	ANA positive	HCQ	AZA	CTX+MMF	MMF	FK506	Lef	RTX	Multi-target	SLEDAI group-baseline	renal response-baseline
1	1	female	14	1	1	17	III+V	18	259.9	0.18	0.03	15.55	6482.19	64	7	1	1	1	0	50	112.52	2.2	2.81	2.89	18.3	1	1				1				3	N
2	1	female	27	6	35	3	IV+V	10	519.6	0.81	0.16	1.06	304.66	63.4	7.3	1	1	1	0	25	115.68	1.8	2.05	0.99	9.24	1	1			1					2	P
3	1	female	27	12	1	23	IV	14	68	0.6	0.12	1.06	654.42	50	31.8	1	1	1	0	25	127.78	2.1			11.4	1	1			1					3	P
4	1	female	33	3	2	18	IV	16	105.3	0.65	0.12	1.87	698.5	68		1	1	1	0	40	102.62	2.3	0.88	0.81	6.51	1	1								3	P
5	1	male	32	4	4	17	IV+V	12	144.2	0.49	0.14	1.57	678.29	71		1	1	0	0	25	118.01	2	2.26	0.69	7.84	1	1			1					2	N
6	1	female	29	240	120	3	no	8	407	0.38	0.06	0.02	7.56	33.8	2.6	0	0	1	0	12.5	143.32	1.2	1.29	1.08	9.24	1	1	1							2	P
7	1	female	24	12	72	42	III+V	22	72.3	0.35	0.07	7.95	4106.91	39.2	16.2	1	1	1	0	50	141.38	2.5				1	1			1					3	N
8	1	female	23	24	35	31	IV	14	10	0.77	0.12	1.87	844.77	66.8	8.8	1	1	1	0	10	111.69	2.1	1.37	0.76	6.23	1				1					3	N
9	1	female	45	84	120	25	IV	8	100	0.66	0.24	0.19	219.62	678	2.5	1	1	1	0	50	5.85	1.5	0.61	0.27	10.1	1	1	1							2	P
10	1	female	40	24	192	4	III+V	6	10	0.98	0.19	0.02	6.44	53	8.4	0	0	0	0	5	114.41	1	2.7	0.45	10.3	1	1						1		1	P
11	1	male	46	1	1	6	IV+V	13	253.8	0.3	0.03	1.54	1187.68	108	20.2	1	1	0	0	50	70.54	2.1	4.51	0.85	9.01	1	1							1	3	N
12	1	female	20	84	84	17	IV	8	526.6	0.39	0.07	3.84	1921.54	78	7.9	1	1	0	0	30	94.58	1.5	1.7	1.13	5.38	1	1				1				2	N
13	1	female	17	1	1	6	IV	21	644.4	0.46	0.06	8.06	1637.69	116	22	1	1	1	0	40	120.12	2.5	4.4	1.3	10.6	1									3	N
14	1	female	40	192	192	12	IV	5	38.1	0.67	0.13	0.1	15.2	44	6.9	0	0	0	0	15	121.63	0.9	5.76	0.64	12.6	1	1				1				1	C
15	1	female	48	1	1	6	IV	20	441	0.07	0.02	8.38	3259.23	75		1	1	1	0	45	81.46	2.4	2.23	1.82	8.91	1	1			1					3	N
16	1	female	22	6	72	6	IV+V	18	675.3	0.25	0.02	1.89	1432.42	50.7		1	1	1	0	50	131.74	2.3	2.26	1.27	14.1	1	1			1					3	N
17	1	female	22	60	96	15	V	6	156.9	0.48	0.07	0.09	3.14	47	2.3	0	0	0	0	10	130.4	1	1.38	0.43	10.1	1	1	1							1	C
18	1	female	33	8	9	26	IV+V	10	10.9	0.65	0.15	1.29	1089.17	57.6	11.2	1	1	0	0	10	116.93	1.2	0.88	0.3	8.3	1	1			1					2	P
19	1	female	46	216	192	16	IV	2	98.3	0.51	0.1	0.25	85.23	65	5	0	0	0	0	7.5	98.22	0.6	2.04	0.38	10.7	1	1					1			1	P
20	1	female	18	4	28	14	IV	16	230.6	0.38	0.04	2.33	2088.41	60	26.3	1	1	1	0	50	127.78	2.3	1.52	0.46	4.94	1	1			1					3	N
21	1	female	46	12	145	9	IV	14	459.7	0.52	0.08	1.43	278.64	53	17.5	1	1	0	0	15	108.16	2.2	5.22	0.46	14.8	1	1								3	P
22	1	female	45	132	132	12	IV	2	131.8	0.96	0.19	0.08	4.23	55	2.2	0	0	0	0	15	109.12	0.5	1.36	0.87	6.91	0	1	1							1	C
23	1	female	29	48	48	7	V	4	203.4	0.56	0.1	0.23	8.56	44	18.6	1	0	0	0	10	127.76	0.7	4.15	0.51	19.1	1	1								1	P
24	1	female	46	1	1	5	IV+V	12	577.2	0.47	0.04	1.65	680.46	64		1	1	1	0	50	100.08	2	3.22	0.54	15.1	1	1			1					2	P
25	1	female	44	4	1	4	III+V	2	86.2	0.49	0.06	0.03	4.52	46	28	0	0	0	0	30	116.55	0.4	2.67	1.53	14	1	1								1	C
26	1	female	38	1	1	6	IV	10	22	0.54	0.14	3.33	2583.9	191	8.4	1	1	0	0	30	28.23	1.4	1.42	0.78	16.1	1	1							1	2	N
27	1	female	36	1	1	7	IV+V	8	515.9	0.68	0.17	2.27	1655.38	40	16.1	1	0	1	0	25	129.09	1.4	1.82	0.39	11.3	1	1		1						2	N
28	1	female	19	1	2	8	IV	10	10	0.47	0.15	0.07	7.67	63		1	1	1	0	40	123.3	1.4			9.62	0	1			1					2	P
29	1	female	42	1	3	7	IV+V	16	623.1	0.36	0.12	3.44	2984.2	71	26	1	1	1	0	50	90.79	2.3	3.79	1.03	10.8	1	1							1	3	N
30	1	female	18	1	2	7	IV	22	6.8	0.53	0.13	2.58	2432.2	115	24	1	1	1	0	50	59.79	2.5	1.12	0.48	5.73	1	1			1					3	N
31	1	female	25	24	3	8	IV	0	61.7	0.64	0.11	0.08	4.06	72	7.3	0	0	0	0	5	100.69	0.2	1.99	1.16	8.49	1	1			1					1	C
32	1	female	48	108	108	8	IV	6	10	0.63	0.15	0.14	30.52	63	2.3	0	0	0	0	7.5	100.58	1	1.85	1.13	8.73	1	1								1	P
33	1	female	39	1	1	9	IV+V	19	413.9	0.08	0.02	0.7	252.28	75	32.4	1	1	0	0	50	87.39	2.4	3.02	1.95	18.1	1	1		1						3	P
34	1	female	52	108	66	13	IV	8	285.3	0.4	0.09	0.27	28.53	50	6.6	1	0	0	0	40	107.2	1.4	4.6	1.17	24.6	1	1								2	P
35	1	female	30	168	180	7	IV+V	16	195.7	0.25	0.02	3.48	2687.4	74	19.4	1	1	1	0	50	93.96	2.3	2.85	1.49	11.9	1	1			1					3	N
36	1	male	52	48	144	8	IV	5	634.7	0.37	0.04	0.43	214.47	75	5.5	1	1	0	0	30	100.26	0.9	1.36	0.46	6.32	1	1								1	P
37	1	female	23	1	1	6	IV	27	226.5	0.16	0.02	6.42	2729.01	130	48.3	1	1	1	1	50	49.94	2.8	2.48	1.47	10.9	1	1								3	N
38	1	female	23	120	120	7	no	4	243.4	0.52	0.12			567	2.4	0	0	0	0	10	8.42	0.8	0.99	0.67	9.99	1									1	P
39	1	female	40	1	48	3	IV+V	10	554.3	0.54	0.1	0.07	122.15	53	12	1	0	0	0	20	114.41	1.5				1	1			1					2	C
40	1	male	15	2	2	3	no	4	161.2	0.67	0.11	0.12	7.69	48	22.8	0	0	0	0	20	122.46	0.8	2.47	0.98	15.8	1	1								1	C
41	1	male	26	60	65	3	IV	2	96.1	0.71	0.21	0.07	4.13	65	4.9	0	0	0	0	5	127.64	0.4	1.91	0.56	10.7	1	1			1					1	C
42	1	female	24	96	84	14	no	12	113.2	0.39	0.18	1.77	1964.83	657	13.7	1	0	0	0	10	6.99	2	2.74	0.85	24.5	1									3	N
43	1	female	28	6	6	6	IV+V	24	632.2	0.33	0.03	2.39	1797.48	51	8.7	1	1	1	1	50	126.06	2.6	2.49	2.29	9.31	1	1							1	3	N
44	1	female	40	240	244	6	IV	2	10	0.5	0.24	0.41	635.8	306	3.1	1	0	0	0	5	15.31	0.4	1.72	1.01	7.34	1	1			1					1	P
45	1	female	26	22	22	6	IV	2	149.3	0.82	0.27			66	5.1	1	0	0	0	5	110.97	0.3			7.94	1	1			1					1	C
46	1	female	47	251	251	5	no	2	10	0.63	0.16			63	3.6	0	0	0	0	5	101.29	0.3			14.3	1	1			1					1	C
47	1	female	38	3	3	3	no	29	10	0.37	0.17	6.08	2700	265	28.8	1	1	1	0	50	19	2.8	0.41	0.72	9.47	1									3	N
48	1	male	38	2	1	4	IV	14	239.1	0.41	0.11	9.87	3100.87	131	19.5	1	1	0	1	50	59.08	2.5	3.42	0.47	8.86	0	1								3	N
49	1	male	47	3	3	3	IV+V	16	10	0.53	0.15	6.04		68	15.4	1	1	0	0	40	108.11	2.5	1.23	0.34	3.22	0	1			1					3	N
50	1	female	47	105	105	4	IV	18	33.8	0.27	0.14			210	7.4	1	1	0	1	35	23.63	2.8			6.24	1	1		1						3	N
51	1	female	42	1	1	4	IV	16	115.8	0.03	0.03	12.29		58	41.7	1	1	1	0	40	109.52	2.6	2.16	0.8	8.64	1	1			1					3	N
52	1	female	44	3	3	4	IV+V	12	43.9	0.83	0.3			56	14.4	1	1	0	1	35	109.24	2.3			9.21	0	1		1						2	N
53	1	female	71	1	2	10	no	4	263.1	0.75	0.26		49.05	222	16.2	0	0	0	0	10	18.8	0.6	1.86	0.78	11.6	0								1	1	C
54	1	female	48	2	43	3	III+V	10	800	0.56	0.14	0.54	134.58	68	11.2	1	0	0	0	50	91.71	1.9	4.02	0.63	17.7	1	1								2	N
55	2	female	35	24	144	12	III+V	4	78	0.82	0.19	5.78	2812.64	53	5.6	1	0	0	0	5	118.5	0.3	1.65	0.24	6.85	1	1							1	1	N
56	2	female	58	1	1	14	III+V	8	440.2	0.41	0.08	1.6	988.79	65	11.5	1	0	0	0	40	90.28	1.3	1.75	1.05	15.2	1	1			1					2	P
57	2	female	53	1	1	16	IV	16	514.9	0.59	0.11	4.59	2651.2	100		1	1	1	0	50	55.55	2.2				1	1		1						3	N
58	2	female	31	2	2	13	II	14	800	0.47	0.14	0.28	49.2	54		1	0	0	0	40	121.13	2.1				1	1								3	N
59	2	female	39	2	94	19	IV+V	16	10	0.58	0.13	0.56	466.37	42		1	0	0	0	40	124.38	2.2	2.78	0.45	6.93	1	1			1					3	P
60	2	male	64	6	6	20	IV+V	16	349.5	0.44	0.1	5.54	2367.84	90	24.9	1	1	1	0	40	77.49	2.2	4.09	0.44	12.6	1	1							1	3	N
61	2	female	47	1	1	23	IV	18	167.2	0.32	0.08	2.36	1950.2	69	21	1	1	1	0	50	90.74	2.3				1	1			1					3	P
62	2	female	47	156	156	22	V	12	105.6	0.42	0.13	0.2	38.9	74		1	0	0	0	35	83.38	2				1			1						3	N
63	2	female	34	36	36	20	IV+V	16	370.8	0.34	0.06	2.02	1675.2	50		1	1	1	0	35	121.65	2.4	2.44	0.75	12.2	1	1			1					3	N
64	2	female	44	96	96	20	V	12	800	0.48	0.07	3.01	2044.65	79.8		1	0	0	0	30	77.73	2	2.92	0.58	8.65	1	1			1					3	N
65	2	female	18	36	36	29	V	10	16.3	0.79	0.17	1.17	1002.2	50.2		1	0	0	0	10	135.5	1.5	1.61	1.19	17	1	1								2	P
66	2	female	22	1	1	28	II	13	800	0.1	0.02	0.57	678.2	53.3		1	1	0	0	50	129.59	2.3				1	1			1					3	P
67	2	female	34	1	1	29	IV	8	800	0.23	0.02	0.24	186.41	44.7		1	0	0	0	20	126.21	1.3	5.96	0.54	15.7	1	1								2	P
68	2	female	41	1	217	29	VI	10	161	0.71	0.19	1.89	1067.3	39		1	0	0	0	20	125.67	1.6	1.51	0.44	5.16	1	1					1			2	N
69	2	female	34	6	126	30	III+V	10	224.1	0.61	0.07	6.42	2346.97	49.6		1	0	0	0	30	121.97	1.5	2.33	0.28	12	1	1		1						2	N
70	2	female	25	2	134	29	III	8	368.2	0.24	0.02	0.22	48.2	34.6		0	0	0	0	30	146.27	1.4				1	1			1					2	C
71	2	female	17	1	1	23	III	16	800	0.41	0.04	0.12	67.2	49		1	1	0	0	50	119.21	2.2	3.38	1.48	15.5	1	1			1					3	P
72	2	female	41	1	145	34	III	14	629.8	0.51	0.06	1.54	896.7	44		1	0	1	0	40	120.78	2.2	1.88	0.29	10.8	1	1			1					3	P
73	2	female	20	1	145	20	IV	16	66.6	0.59	0.13	1.61	1024.1	52.9		1	1	1	0	20	131.75	2.3				1	1								3	P
74	2	female	23	1	16	36	V	12	140.3	0.56	0.13	4.53	2866.9	48	21.8	1	1	0	0	30	133.19	2				1	1								3	N
75	2	female	38	1	1	29	IV+V	20	431.9	0.23	0.05	3.62	2750.2	76.4		1	1	1	1	25	85.46	2.6				1	1							1	3	N
76	2	female	24	2	132	38	IV+V	8	210.6	0.65	0.12	3.93	2190	59.4		1	0	0	0	15	123.31	1.1				1	1			1					2	N
77	2	female	23	1	1	39	IV	16	705.3	0.39	0.04	1.31	1286.16	63.1		1	1	1	0	50	119.66	2.4	3.04	0.66	13.6	1	1			1					3	P
78	2	female	20	24	24	43	IV+V	20	152.4	0.55	0.21	2.82	1736.03	131.8	2.4	1	1	1	1	30	50.16	2.6	1.21	0.78	6.07	1	1							1	3	N
79	2	female	32	108	156	40	IV	12	131.6	0.78	0.15	0.84	408.01	92.7		1	0	0	0	5	70.55	2				0	1								3	P
80	2	female	39	1	1	44	IV+V	14	10	0.38	0.1	0.47	1240.61	102		1	1	1	0	40	59.84	2.1	1.09	0.93	8.41	1				1					3	N
81	2	female	25	12	12	46	IV+V	12	168.7	0.53	0.27	3.58	2144.89	43.9	30.7	1	0	1	0	40	135.25	2	2.1	1.05	6.74	1	1							1	3	N
82	2	male	29	1	1	49	IV+V	16	691.8	0.23	0.03	1.16	1844.79	127.3		1	1	1	0	40	65.16	2.2	1.6	0.78	20.2	1	1							1	3	N
83	2	female	32	2	16	51	V	8	411	0.45	0.02	0.54	303.78	42		1	0	0	0	20	130.65	1.4	3.7	0.83	10.4	1	1				1				2	P
84	2	female	30	1	1	48	IV	22	444.5	0.24	0.06	3.22	1291.12	106.1	15.4	1	1	1	0	50	60.78	2.7				1	1			1					3	N
85	2	female	22	1	1	51	III+V	8	27.9	0.75	0.1	3.36	3100.03	41.4		1	0	0	0	40	140.82	1.5	3.27	1.78	5.78	1	1				1				2	N
86	2	female	32	2	2	55	IV	22	624.1	0.6	0.11	1.83	2429.59	89.1		1	1	1	1	50	74.02	2.6	4.57	0.92	15.9	1	1		1						3	N
87	2	male	50	6	84	55	III+V	14	254	0.39	0.1	1.07	729.01	64.3		1	0	1	0	50	108.32	2	1.84	0.41	11.1	1	1							1	3	P
88	2	female	18	1	1	59	V	12	698.4	0.07	0.02	0.19	85.52	46.4	16.6	1	1	0	0	50	139.06	2	5.24	3.55	29.1	1	1								3	N
89	2	female	29	1	1	57	III+V	12	80.8	0.67	0.13	0.52	517.66	43.2	35.3	1	0	0	0	40	132.2	2	2.02	0.92	7.2	1	1			1					3	P
90	2	female	61	1	1	63	IV	12	68.5	0.35	0.05	2.41	3189.94	64.8	6.1	1	0	1	0	50	72.62	2	5.43	0.88	21.9	1	1			1					3	N
91	2	female	31	1	1	64	IV	20	383	0.26	0.04	5.91	1609.4	180.2		1	1	1	1	50	37.8	2.5				1	1			1					3	N
92	2	female	38	151	152	68	IV	22	752.5	0.19	0.02	4.01	3346.3	85		1	1	1	0	50	62.29	2.6	3.74	1.2	12.8	1	1		1						3	N
93	2	female	32	2	2	74	III+V	12	216.2	0.63	0.18	3.24	1508.71	65.2	23.1	1	0	1	0	50	107.62	2	3.9	1.79	21	1	1			1					3	N
94	2	female	29	1	1	70	IV	12	800	0.51	0.11	8.52	5286.2	91		1	1	0	0	50	84.92	2	1.98	0.92	11.4	1				1					3	N
95	2	male	47	192	192	66	IV+V	16	800	0.28	0.04	3.17	2985.1	449	25.6	1	1	1	0	30	15.74	2.4	2.53	0.6	9.29	1	1		1						3	N
96	2	female	24	1	15	70	V	6	66.3	0.51	0.13	3.21	2986.8	69		1	0	0	0	50	75.36	1	2.43	1.91	10.4	1	1				1				2	N
