# Supplementary material for: Clinical outcomes in lupus nephritis patients treated with belimumab in real-life setting: a retrospective comparative study in China
Source: PeerJ. 2024 Sep 19;12:e18028. doi: 10.7717/peerj.18028 (PMC11416754; doi:10.7717/peerj.18028)
Supplement: Supplemental Information 2 [file peerj-12-18028-s002.xlsx]

## Sheet: Sheet1
patient ID	group	gender	SLEDAI-month3	SLEDAI-month6	SLEDAI-month12	C3-month3	C3-month6	C3-month12	C4-month3	C4-month6	C4-month12	creatinine-month3	creatinine-month6	creatinine-month12	B-cell percent-month3	B-cell percent-month6	B-cell percent-month12	dsdna-month3	dadna-month6	dsdna-month12	Glucocorticoid dose-month3	Glucocorticoid dose-month6	Glucocorticoid dose-month12	proteinuria-month3	proteinuria-month6	proteinuria-month12	hematuria-month3	hematuria-month6	hematuria-month12	Leukocytouria-month3	Leukocytouria-month6	Leukocytouria-month12	cylindruria-month3	cylindruria-month6	cylindruria-month12	ACR-month3	ACR-month6	ACR-month12	GFR-baseline	GFR-month3	GFR-month6	GFR-month12	PGA-month3	PGA-month6	PGA-month12	IgA-month3	IgM-month3	IgG-month3	IgA-month6
1	1	female	8	8	8	0.82	0.67	0.44	0.1	0.07	0.05	35	45	48	6.7	6.1	1.7	10	249.2	433.1	25	17.5	15	1	1	1	0	1	0	1	0	0	0	0	0	72.71	59.53	100.08	112.52	149.02	150.75	147.64	1.5	1.5	1.3	1.21	1.83	6.98	1.51
2	1	female	8			0.71			0.19			59.4			4.9			648.7			10			1			0			1			0			92.32			115.68	120.74			1.5			1.82	0.89	9.73	1.74
3	1	female	8	10	2	0.79	0.67	0.56	0.16	0.14	0.14	44	39	42	3.7	3.6	2.6	78.3	58.9	89.5	10	10	5	1	1	1	1	1	0	0	0	0	0	0	0	532.23	345.9	120.3	127.78	133.27	138.66	134.37	1.4	1.2	0.3				0.48
4	1	female	6	8	4	0.76	0.71	0.71	0.16	0.15	0.14	68	55	54	10.7	6.2	5.9	190.7	138	205.8	20	20	5	1	1	0	1	1	0	0	0	0	0	0	0	523.09	200.09	78.2	102.62	114.75	118.72	119.44	1	1.1	0.4	0.72	0.67	9.56	0.73
5	1	male	12	12	12	0.53	0.62	0.57	0.16	0.18	0.2	76	71	76		6.2	2.5	435.4	379.9	381.1	15	7.5	5	1	1	1	1	1	1	0	0	0	0	0	0	405.61	300.09	310.09	118.01	113.95	117.18	113.15	1.5	1	1.1	2.48	0.63	7.41	2.33
6	1	female	8			0.43			0.02			36.6			2.9			327			12.5			0			0			1			0			65.76			143.32	139.61			1.1	1.1	1.1			11
7	1	female	10	10	10	0.7	0.66	0.58	0.14	0.13	0.14	33.4	35	35	15.7	12.2	5.8	72.5	65.2	75.9	35	15	10	1	1	1	1	1	1	0	0	0	0	0	0	3524.68	1937.8	656.44	141.38	149.02	146.75	145.72	1.8	1.5	1.1
8	1	female	8	8	6	0.71	0.7	0.73	0.11	0.15	0.12	68.6	74.9	78	8.3	9.7	6.7	10	10	10	10	10	10	1	1	1	0	1	0	0	0	0	0	0	0	1203.3	1000.3	879.2	111.69	108.16	97.26	91.96	1.5	1.4	1.1	1.38	0.75	11.2	1.4
9	1	female	2	2	2	0.7	0.59	0.56	0.27	0.19	0.16	649.1	636	576.6	6.4	2.1	1.9	45	10	46.2	35	15	10	1	1	1	0	0	0	0	0	0	0	0	0	122.5	306.74	200.1	5.85	6.12	6.28	7.02	1	0.4	0.4			6.41
10	1	female	2			0.83			0.21			51			6.1			10.9			5			0			0			0			0			5.27			114.41	115.87			0.4			1.75	0.32	8.77
11	1	male	10	6		0.56	0.7		0.12	0.15		73	72		17.6			10	10		40	35		1	1		1	1		0	0		0	0		1012.2			70.54	105.74	106.34		1.9	1		1.67	0.63	4.36
12	1	female	8	8	8	0.43	0.53	0.5	0.11	0.12	0.11	61	82	68	5	4	4.3	397.9	188.9	347.6	25	20	17.5	1	1	1	1	1	0	1	1	1	0	0	0	2988.51	2980.1	2019.2	94.58	125.72	88.41	110.86	1.4	1.4	1.3	1.52	1.03	5	1.74
13	1	female	10			0.79			0.1			64			22.4			78.1			20			1			1			0			0						120.12	121.7			1.7	1.7
14	1	female	4	4	4	0.69	0.73	0.72	0.13	0.14	0.14	43	51	46	7	3	4	10	12.4	32.4	15	15	10	0	0	0	0	0	0	0	0	0	0	0	0	5.27	6.42		121.63	121.7	115.06	119.03	0.7	0.7	0.6	5.51	0.62	13.5	5.19
15	1	female	6	6		0.5	0.54		0.15	0.12		69	70		13.2	8.9		10	11		25	12.5		1	1		1	1		0	0		0	0		43.3	13.87		81.46	90.1	88.55		1	1		1.71	1.56	5.87	1.97
16	1	female	2	2		0.82	0.48		0.17	0.06		66	55					35.1	93.4		20	12.5		1	0		0	0		0	0		0	0		100.2	98.3		131.74	114.13	128.26		0.4	0.4		2.38	1.08	7.56
17	1	female	4	4	4	0.62	0.59	0.59	0.09	0.08	0.1	59	61	60	1.9	1.4	1.9	157	239.5	227	10	10	7.5	0	0	0	0	0	0	0	0	0	0	0	0	5.27	9.25	9.98	130.4	121	119.68	119.5	0.8	0.8	0.8			13.2
18	1	female	6	4	2	0.71	0.69	0.74	0.14	0.16	0.16	56	67	69	7.9	4.8	2.2	28.2	29.7	23.4	10	7.5	5	1	1	0	0	0	0	0	0	0	0	0	0	437.28	212.76	100.09	116.93	118.02	103.74	99.42	1	0.8	0.4	1.06	0.44	11.5	1.17
19	1	female	6	2	2	0.55	0.45	0.62	0.09	0.1	0.13	63	68	69	5.5	4.8	4	99	67.7	73.6	7.5	10	5	1	1	0	0	0	0	0	1	0	0	0	0	318.47	86.88	67.3	98.22	102	93.01	90.74	0.9	0.4	0.4	1.58	0.27	7.49	1.47
20	1	female	10	8	4	0.47	0.47	0.52	0.02	0.07	0.06	70	60	60	16.5	8.4	5.2	98.7	168.9	272.1	20	15	10	1	1	1	1	0	0	0	0	0	0	0	0	910.84	502.24	269.49	127.78	108.97	127.29	127.29	1.7	1.4	0.8	1.23	0.34	4.53	1.45
21	1	female	4	6		0.66	0.7		0.13	0.16		59	55		13.4	7.5		169.4	83.5		15	15		0	1		0	0		0	0		0	0		5.27	7.23		108.16	104.1	106.1		0.7	1					4.35
22	1	female	0	2	0	0.95	1	1.08	0.2	0.24	0.2	49	52	52	3.9	3.3	1.2	10	140.8	10	25	25	10	0	0	0	0	0	0	0	0	0	0	0	0	9.2	9.46		109.12	113.35	110.38	110.38	0.3	0.5	0.2	1.18	0.73	6.4	6.87
23	1	female	2	2		0.59	0.65		0.18	0.19		45	50		8.3	8.5		66.5	51.5		2.5	2.5		0	1		0	0		0	0		0	0		8.56			127.76	126.82	122.5		0.4	0.3		2.43	0.38	14.3
24	1	female	8	2		0.64	0.66		0.08			51	62					199.6	97		10	10		1	0		0	0		0	0		0	0			41.8		100.08	111.09	104.17		1.4	0.2				12.6
25	1	female	2	0		0.76	0.79		0.16	0.18		57	55		17.3			10	10		15	10		0	0		1	0		0	0		0	0					116.55	107.85	109.12		0.4	0.1				12.4
26	1	female	6	12		0.66	0.73		0.14	0.19		97	91		4.1	1.4		10	10		15	15		1	1		1	0		0	0		0	0		2209.98	3894.62		28.23	64.03	69.17		1	1		0.97	0.28	5.77	1
27	1	female	0	6		0.79	0.8		0.22	0.21		51	44		19.2	7.5		10	268.1		25	25		0	1		0	0		0	0		0	0		866.23			129.09	119.17	124.22		0.8	1				6.61
28	1	female	2	2		0.47	0.44		0.15	0.12		51	43		22.1	16.4		10	20.5		25	5		0	0		0	0		0	0		0	0		7.67			123.3	134.29	142.04		0.4	0.4				6.84
29	1	female	8	4		0.98	0.99		0.2	0.21		65	69		17.6	13.1		10	10		25	15		1	0		1	1		0	0		0	0		1242.4			90.79	100.31	93.32		1.5	0.6				6.01
30	1	female	4	4		0.89	0.55		0.21	0.14		55	52		11.7	9.6		174.7	110.9		20	5		1	1		0	0		0	0		0	0		1432.42			59.79	131.49	105		0.5	0.4				2.83
31	1	female	4	2		0.79	0.65		0.12	0.1		63	55		8.8	8.3		10	74.2		5	5		0	0		1	0		0	0		0	0		7.87	4.93		100.69	118.22	125.58		0.3	0.2				8.77
32	1	female	2	2		0.64	0.62		0.17	0.16		67	67		3.4	2.2		10	10		7.5	7.5		0	0		1	0		1	0		0	0		21.5	43		100.58	92.71	92.71		0.2	0.3				7.09
33	1	female	2	2	2	0.63		0.63	0.09			78	75		17.2	17.3		18.5	15.8		30	25		1	0	0	0	1	0	0	0	0	0	0	0	210	120.2		87.39	83.34	87.39		0.4	0.4	0.2	2.17	0.88	5.69
34	1	female	2	6	4	0.61	0.61	0.62	0.16	0.17	0.18	51	58	56	14.7	10.2	8.4	42.7	39.8	155.6	35	30	10	0	1	1	0	0	0	0	1	0	0	0	0	15.2	16.2		107.2	106.5	102.09	102.55	0.5	1	0.9	3.05	0.7	13.1	2.72
35	1	female	6	6		0.7	0.73		0.14	0.16		59	55		4.6	4.4		10	24.1		35	10		1	1		0	0		0	0		0	0		1324.2			93.96	118.48	121.25		1	1		1.43	0.8	4.46
36	1	male	4	4	6	0.57	0.71	0.79	0.1	0.13		85	85		3.4	4.6		155.3	154.7		20	10		1	1	1	0	1	0	0	0	0	0	0	0	50.18	54.58		100.26	90.33	90.33		0.8	0.8	0.9
37	1	female	10	8		0.64	0.8		0.1	0.16		40	44		29.4	14.8		10	19.9		30	20		1	1		1	0		0	0		0	0		1249.2			49.94	141.43	137.06		1.5	1.2				8.24
38	1	female	4	4		0.51	0.44		0.12	0.11		822	777		3.1	3.2		145.7	132		10	10		0	0		0	0		0	0		0	0					8.42	5.37	5.71		0.8	0.7				9.32
39	1	female	8	4		0.66	0.72		0.12	0.1		50	49		6.1	6		93	229.6		15	12.5		1	0		0	0		0	0		0	0					114.41	115.81	116.58		1.2	0.8
40	1	male	2	0		0.76	0.94		0.16	0.16		60	64		14	10.5		52	43.8		10	5		0	0		0	0		0	0		0	0					122.46				0.5	0.1
41	1	male	2	0		0.78	0.79		0.21	0.21		64	61		7.6	3.2		212.6	75.9		5	5		0	0		0	0		0	0		0	0					127.64	128.45	130.1		0.4	0.4				10.9
42	1	female	4	2	4	0.57	0.58	0.52	0.29	0.36	0.3	817	666	909	5.3	5.3	3.8	83.6	99.5	211	10	10	10	1	0	0	0	0	0	0	0	0	0	0	0	762.4			6.99	5.37	6.88	4.69	0.8	0.4	0.5	1.53	0.51	11.5	2.09
43	1	female	6	6		0.55	0.56		0.12	0.12		66	48		9.8	6.9		38.2	120.6		25	10		1	1		0	0		0	0		0	0					126.06	108.65	127.7		1	1				4.96
44	1	female	2	2		0.63	0.56		0.32	0.26		407	422			2.8		10	10		5	2.5		1	1		0	0		0	0		0	0			591.26		15.31	10.84	10.38		0.3	0.3				7.08
45	1	female	4	2		0.79	0.79		0.22	0.26		69	70			7.5		96.1	114.8		5	5		0	1		0	0		0	0		0	0					110.97	105.16	103.35		0.4	0.3				7.43
46	1	female	2	2		0.58	0.61		0.15	0.17		59	57		4.7	4.4		77.7	78.9		5	5		0	0		0	0		0	0		0	0					101.29	105.14	106.34		0.3	0.2				12.4
47	1	female	10			0.53			0.42			412			2.2			10			35			1			1			1			0						19	11.14			1.5			0.11	0.28	4
48	1	male	4			0.81			0.17			74			13.4			10			30			1			0			0			0						59.08	111.23			0.6
49	1	male	12			0.58			0.13			69			3.1			10			30			1			1			0			0						108.11	106.71			2					5.41
50	1	female	10									156						83.9			20			1			1			0			0						23.63	33.61			1.8					4.22
51	1	female	10			0.31			0.17			50			18.6			10			40			1			1			0			0						109.52	114.19			1.9					4.16
52	1	female	10			0.83			0.3			59			23.5			114			15			1			1			0			0						109.24	107.38			2.2					5.5
53	1	female	2	6		0.79	0.69		0.27	0.26		215	207		13.5	12.3		254	94.7		10	10		0	1		0	0		0	0		0	0			161.46		18.8	19.54	20.45		0.2	1
54	1	female	4			0.79			0.19			65			16.2			375			35			1			0			0			0						91.71	96.85			0.8					7.97
55	2	female	6	4	4	0.84	0.84	1.04	0.21	0.21	0.21	58	61	62	6.5	0.1	1.5	170.4	23.3	10	5	5	5	1	1	1	0	0	0	0	0	0	0	0	0	2816.9	1242.1	1624.2	118.5	115.04	113.14	111.75	0.8	1.1	0.8
56	2	female	6	6	4	0.5	0.51	0.52	0.06	0.08	0.09	58	49	48		3		46.8	88.4	123.2	25	10	10	1	1	0	0	0	0	0	0	0	0	0	0	444.2	355.2	63.1	90.28	97.87	103.46	103.43	1	1	0.6				1.07
57	2	female	14	6	22	0.86	0.87	0.56	0.17	0.16	0.09	114	80	98				323	313.7	565.6	30	15	25	1	0	1	1	1	1	1	0	1	0	0	1	898.2	45.3	1022.2	55.55	47.08	72.51	56.13	2.1	1	2.9				2.8
58	2	female	6	4	4	0.95	0.89	1.21	0.2	0.2	0.31	57	58	55				141.4	39.1	10	25	17.5	7.5	0	0	0	1	1	1	0	0	0	0	0	0	45.2	62.2	43.2	121.13	118.99	118.32	119.56	1.1	0.5	0.5				5.15
59	2	female	6	6	10	0.64	0.66	0.59	0.13	0.15	0.12	51	40	51				10	10	10	20	12.5	10	1	1	1	0	0	0	0	0	1	0	0	0	362.1	521.2	1642.4	124.38	116.68	125.51	115.87	1	1	1.9	3.36	0.55	10.1	3.37
60	2	male	6	10	6	0.7	0.65	0.71	0.2	0.18	0.22	108	89	105				46.6	23.4	31.7	20	7.5	7.5	0	1	1	1	1	0	0	0	0	0	0	0	34.2	355.1	78.2	77.49	62.16	78.54	63.86	1	1.5	1
61	2	female	8	8	6	0.87	0.76	0.62	0.21	0.15	0.12	103	68	64				10	23.5	41.5	15	10	5	1	0	0	1	1	1	1	1	0	0	0	0	139.47	24.1	58	90.74	55.51	91.71	98.68	1.2	1.2	1
62	2	female	4	0	0	1.02	0.94	0.96	0.27	0.24	0.26	85	72	65				10	10	10	30	10	5	1	0	0	0	0	0	0	0	0	0	0	0	231.1	49.2	45.7	83.38	7.02	85.58	96.85	0.9	0.2	0.1	3.52	1.33	11.2	2.89
63	2	female	14	8	2	0.55	0.52	0.5	0.13	0.12	0.11	46	51	51				131.5	115.6	66.8	30	20	15	1	0	0	1	1	0	1	0	0	0	0	0	425.2	67.2	35.2	121.65	124.15	120.01	120.01	2.4	1.6	0.4	2.75	0.95	12.3
64	2	female	14	8	12	0.59	0.67	0.77	0.09	0.1	0.11	102	123	111	1.3			360.6	351	534	20	15	15	1	0	1	1	0	0	1	1	1	0	0	0	517.66	64.2	864.6	77.73	57.77	45.75	51.79	2.1	1.5	2
65	2	female	4	12	6	0.81	0.82	0.76	0.21	0.16	0.13	51	60	55				16.3	24.3	19	25	25	25	1	1	1	0	1	0	0	1	0	0	0	0	264.2	864.1	423.5	135.5	124.77	127.78	130.99	0.9	2	1	0.17			1.5
66	2	female	6	6	2	0.49	0.5	0.77	0.14	0.16	0.21	57	56	60				32.5	19.3	17	50	30	20	1	1	0	0	0	0	0	0	0	0	0	0	912.2	957.1	49.2	129.59	125.87	126.61	123.77	1	1.2	0.4
67	2	female	0	8	14	0.81	1.13	0.91	0.15	0.21	0.14	59	59	56				78	26.6	122.4	10	5	5	0	0	1	0	1	1	0	1	1	0	0	0	45.1	54.2	357.1	126.21	115.2	115.2	117.19	0.9	1.5	2.3
68	2	female	4	6	4	0.85	0.81	0.88	0.24	0.16	0.23	52	49	48				77.7	226.3	39.6	25	20	10	1	1	1	0	0	0	0	0	0	0	0	0	142.3	1482.2	246.8	125.67	114.32	115.76	115.74	0.6	1	0.8	1.69	0.51	7.93
69	2	female	6	6	4	0.83	0.95	0.88	0.22	0.21	0.21	50	59	57				209.1	319	44.8	10	10	5	1	1	1	0	0	0	0	0	0	0	0	0	697.2	856.3	857.9	121.97	121.65	115.2	116.51	1	1	1
70	2	female	2	2	2	0.6	0.57	0.75	0.06	0.07	0.14	40	55	40				66.2	64.3	54.2	10	15	5	0	0	0	0	0	0	0	0	0	0	0	0	34.2	45.2	23.6	146.27	135.16	124.7	139.01	0.3	0.2	0.2
71	2	female	4	2	2	0.73	0.62	0.75	0.08	0.09	0.11	56	60	55				162.8	99	66	20	10	5	0	0	0	0	0	0	0	0	0	0	0	0	24.2	43.2	46.8	119.21	104.31	97.36	106.21	0.8		0.2
72	2	female	8	12	8	0.9	0.78	0.81	0.14	0.09	0.12	56.8	61	76				666.7	694.3	335.7	40	30	12.5	1	1	1	0	0	0	0	1	0	0	0	0	169.2	251.2	847.1	120.78	111.21	108.47	83.62	1.8	2	1.5
73	2	female	6	4	4	0.81	1.02	0.87	0.26	0.35	0.29	74.4	60.6	62				136.6	13.8	22.5	12.5	10	10	0	1	1	0	0	0	0	0	0	0	0	0	43.2	753.1	48.2	131.75	99.82	125.99	124.17	1	0.9	0.5				1.35
74	2	female	8	4	6	0.65	0.79	0.65	0.17	0.24	0.16	57	45.5	57				101.2	22.9	26.5	25	10	5	1	1	1	0	0	0	0	0	0	0	0	0	926.1	432.1	204	133.19	125.87	134.61	124.99	1.7	0.5	1
75	2	female	4	0	0	0.69	0.8	0.79	0.13	0.2	0.17	71	66	58				160.9	19.9	79.8	10	5	5	0	0	0	0	0	0	0	0	0	0	0	0	46.2	23.1	27.1	85.46	93.38	102	111.85	0.9	0.1	0.1
76	2	female	8	8	8	0.67	0.75	0.58	0.13	0.17	0.12	60	74.6	78				202.2	140.6	150	15	12.5	10	1	1	1	0	0	0	0	0	0	0	0	0	2231.2	1923.2	1721.2	123.31	111.03	97.05	91.31	1.2	1.8	1.8				3.7
77	2	female	6	6	6	0.8	0.85	0.76	0.12	0.13	0.13	53	53	65				55	73.5	46.3	25	5	5	0	0	0	0	1	1	0	0	0	0	0	0	42.5	32.1	38.1	119.66	128.02	128.02	115.07	1	1	1
78	2	female	12	12	12	0.56	0.6	0.57	0.12	0.12	0.12	59	51	44.9				152.4	401.2	398.2	20	10	5	1		1	1	1	1	0	0	0	0	0	0	874.2	1472.3	1472.3	50.16	127.1	133.35	138.08	2	2	2	0.21
79	2	female	0	4	8	0.81	0.59	0.62	0.18	0.14	0.17	113.4	95	107				98	150.2	146.4	5	5	5	0	1	1	0	0	0	0	0	0	0	0	0	65.2	385.1	477.4	70.55	55.3	68.49	59.13	0.1	0.6	1.5
80	2	female	8	6	2	0.85	0.61	0.65	0.14	0.11	0.11	62.2	79	61.5				10	10	10	25	10	5	1	0	0	1	1	0	0	0	0	0	0	0	480	260	39.5	59.84	108.05	80.93	108.95	1.5	1	0.4
81	2	female	14	6	6	71	0.76	0.48	0.09	0.13	0.06	52	45	44				39.8	11.6	88.2	30	15	10	1	1	1	1	0	0	1	0	0	0	0	0	552.1	395.1	164.2	135.25	127.92	134.15	134.2	2.2	1	1
82	2	male	8	8	6	0.79	0.69	0.79	0.24	0.17	0.17	83	62	71.3				60.6	136.1	111.1	25	15	20	1	0	0	1	1	1	0	0	0	0	0	0	674.2	43.1	48.5	65.16	109.28	127.43	119.47	1.4	1.5	1
83	2	female	8	8	8	0.44	0.48	0.51	0.02	0.04	0.1	38	44	44				315.3	225.7	201.5	20	20	20	1	1	1	0	0	0	0	0	0	0	0	0	474.2	956.1	254.1	130.65	135.02	127.76	127.76	1.7	1.5	1.5
84	2	female	10	6	6	0.56	0.77	0.68	0.11	0.19	0.17	71.2	74	67				89.9	46.6	89	30	10	5	1	0	1	1	1	1	0	0	0	0	0	0	232.4	47.8	40.1	60.78	97.75	93.3	105.21	1.8	1	1
85	2	female	4	4	6	1.12	1.1	1.02	0.16	0.23	0.12	58	48	55				10	10	10	30	10	5	1	1	1	0	0	0	0	0	0	0	0	0	1426.2	857.3	356.8	140.82	126.04	133.19	127.36	0.6	0.5	1
86	2	female	2	10	2	0.57	0.69	0.69	0.12	0.14	0.14	45	51	59				37.1	56.1	94.7	25	10	20	0	1	0	0	1	0	0	0	0	0	0	0	23.2	371.1	49.1	74.02	127.72	122.57	116.01	0.8	1.7	0.2
87	2	male	8	2	4	0.65	0.64	0.56	0.16	0.17	0.13	70	72	70				229.3	98	456.6	50	40	30	1	0	0	0	0	0	0	0	0	0	0	0	344.2	225.52	43.9	108.32	104.6	102.67	103.87	1.4	0.2	0.6
88	2	female	8	6	4	0.39	0.26	0.32	0.08	0.04	0.04	64	54	45.7				110	64	101	45	20	10	0	0	0	0	1	0	1	0	0	0	0	0	26.4	58.2	47.4	139.06	120.98	131.78	139.2	1.5	1	0.6
89	2	female	2	2	0	0.76	0.76	0.81	0.14	0.14	0.18	50	48.3	39.2				80.6	78.7	66.6	25	20	15	0	0	0	0	0	0	0	0	0	0	0	0	37.2	38.5	28.1	132.2	125.11	126.54	135.54	0.1	0.2	0.1
90	2	female	4	4	4	1.06	0.87	0.91	0.26	0.18	0.21	63	61.4	52.6				12.6	10	10	35	10	10	0	0	0	0	0	0	0	0	0	0	0	0	266.3	296.1	350.6	72.62	91.16	93.4	98.27	0.8	0.6	0.4
91	2	female	12	8	4	0.56	0.81	0.91	0.13	0.21	0.22	110	97	85				202	67.6	50	30	10	5	1	1	0	1	1	1	0	0	0	0	0	0	567.2	268.1	29.6	37.8	57.77	66.79	78.35	2	1.3	0.7
92	2	female	10	6	2	0.6	0.68	0.66	0.09	0.07	0.7	60.2	73.7	60.3				72.1	55.3	62.4	40	25	12.5	1	0	0	1	1	0	0	0	0	0	0	0	255.3	38.4	27.1	62.29	111.27	89.56	110.43	1.8	1	0.2
93	2	female	10	8	2	0.76	0.8	0.75	0.13	0.16	0.12	55	63	59				28.7	99.1	80.8	30	25	10	1	1	0	0	0	0	1	1	0	0	0	0	684.2	764.2	67.4	107.62	119.17	112.18	116.01	1.6	1.3	0.1
94	2	female	12	10	8	0.67	0.76	0.81	0.12	0.14	0.19	67.2	69.2	78				234.1	80.6	86.5	50	35	10	1	1	1	1	1	0	0	0	1		0	0	1535.2	1567.2	386	84.92	105.97	102.28	88.5	2	1.8	1.1
95	2	male	6	10	10	0.46	0.55	0.66	0.1	0.18	0.17	441	781	963	15.9	8.2		10	10	35.9	10	5	5	1	1	1	0	0	0	0	1	1	0	0	0	3705.98	3053.35	791.83	15.74	26.98	22.66	13.79	1	1.9	1.9
96	2	female	6	6	4	0.71	0.76	0.81	0.14	0.14	0.16	61	73.8	78.2				45.5	45.6	45.3	45	25	10	1	1	1	0	0	0	0	0	0	0	0	0	1231.2	785.2	253	75.36	121.84	98.01	91.38	1	1	0.9
[truncated: 23 more columns]
